# Supplementary material
Source: PubMed Central journal article supplement (PMC6547827)
Supplement: NIHMS1021714-supplement-Supplement.pdf [file NIHMS1021714-supplement-Supplement.pdf]

## Supplementary Online Content

Seddon JM, Reynolds R, Yu Y, Rosner B. Validation of a prediction algorithm for progression to advanced macular degeneration subtypes. *JAMA Ophthalmol*. Published online February 14, 2013. doi:10.1001/jamaophthalmol.2013.2578.

**eTable 1.** Multivariate Association Between Demographic, Environmental, Macular, and Genetic Variables and Progression to Geographic Atrophy for Derivation and Validation Samples

**eTable 2.** Multivariate Association Between Demographic, Environmental, Macular, and Genetic Variables and Progression to Neovascular Disease for Derivation and Validation Samples

This supplementary material has been provided by the authors to give readers additional information about their work.

**eTable 1: Multivariate Association Between Demographic, Environmental, Macular, and Genetic Variables and Progression to Geographic Atrophy**

|                                      | Derivation Sample | P-value | Validation Sample | P-value |
|--------------------------------------|-------------------|---------|-------------------|---------|
|                                      | HR (95% CI)       |         | HR (95% CI)       |         |
| <b>Progressors/Non-Progressors</b>   | 355/2559          |         | 144/835           |         |
| <b>Age(y)</b>                        |                   |         |                   |         |
| <65                                  | 1.0               |         | 1.0               |         |
| 65-74                                | 1.3 (1.0 - 1.8)   | 0.060   | 1.1 (0.6-2.1)     | 0.688   |
| 75+                                  | 2.0 (1.4 - 2.9)   | <0.0001 | 2.8 (1.5-5.1)     | 0.001   |
| <b>Sex</b>                           |                   |         |                   |         |
| Female                               | 1.0               |         | 1.0               |         |
| Male                                 | 1.2 (1.0-1.5)     | 0.088   | 1.3 (0.9-1.9)     | 0.126   |
| <b>Education</b>                     |                   |         |                   |         |
| ≤ High School                        | 1.0               |         | 1.0               |         |
| > High School                        | 0.9 (0.7-1.0)     | 0.202   | 0.8 (0.6-1.2)     | 0.338   |
| <b>Smoking</b>                       |                   |         |                   |         |
| Never                                | 1.0               |         | 1.0               |         |
| Past                                 | 1.0 (0.8-1.3)     | 0.968   | 0.8 (0.5-1.0)     | 0.127   |
| Current                              | 1.3 (0.9-2.0)     | 0.203   | 2.0 (1.1-3.6)     | 0.021   |
| <b>BMI</b>                           |                   |         |                   |         |
| <25                                  | 1.0               |         | 1.0               |         |
| 25-29                                | 1.1 (0.8-1.4)     | 0.505   | 1.1 (0.7-1.6)     | 0.788   |
| 30+                                  | 1.3 (1.0-1.7)     | 0.051   | 1.3 (0.8-2.0)     | 0.302   |
| <b>ARMS2/HTRA1:rs10490924 (A69S)</b> |                   |         |                   |         |
| GG                                   | 1.0               |         | 1.0               |         |
| GT                                   | 1.6 (1.3-2.1)     | <0.0001 | 1.3 (0.9-1.9)     | 0.120   |
| TT                                   | 2.4 (1.8-3.3)     | <0.0001 | 1.9 (1.1-3.1)     | 0.015   |
| <b>CFH:rs1061170 (Y402H)</b>         |                   |         |                   |         |
| TT                                   | 1.0               |         | 1.0               |         |
| CT                                   | 1.0 (0.7-1.3)     | 0.782   | 0.9 (0.5-1.6)     | 0.673   |
| CC                                   | 1.3 (0.8-1.9)     | 0.255   | 0.9 (0.5-1.7)     | 0.664   |
| <b>CFH:rs1410996</b>                 |                   |         |                   |         |
| TT                                   | 1.0               |         | 1.0               |         |
| CT                                   | 2.3 (1.3 - 4.3)   | 0.007   | 0.9 (0.4-2.1)     | 0.858   |
| CC                                   | 3.0 (1.6 - 5.7)   | 0.001   | 1.8 (0.7-4.3)     | 0.217   |
| <b>C2:rs9332739(E318D)</b>           |                   |         |                   |         |
| GG                                   | 1.0               |         | 1.0               |         |
| CG/CC                                | 0.4 (0.2-0.8)     | 0.008   | 1.0 (0.5-1.8)     | 0.910   |

|                                               | Derivation Sample |         | Validation Sample |         |
|-----------------------------------------------|-------------------|---------|-------------------|---------|
|                                               | HR (95% CI)       | P-value | HR (95% CI)       | P-value |
| <b>CFB:rs641153(R32Q)</b>                     |                   |         |                   |         |
| CC                                            | 1.0               |         | 1.0               |         |
| CT/TT                                         | 0.7 (0.5-1.0)     | 0.042   | 1.2 (0.8-2.1)     | 0.395   |
| <b>C3:rs2230199(R102G)</b>                    |                   |         |                   |         |
| CC                                            | 1.0               |         | 1.0               |         |
| CG                                            | 1.2 (0.9-1.5)     | 0.141   | 1.0 (0.4-1.5)     | 0.807   |
| GG                                            | 1.5 (1.0-2.2)     | 0.039   | 1.1 (0.6-2.0)     | 0.783   |
| <b>Baseline Grade in each Eye<sup>a</sup></b> |                   |         |                   |         |
| 11/12/22                                      | 0.07 (0.04-0.1)   | <0.0001 | 0.3 (0.2-0.4)     | <0.0001 |
| 13/23/33                                      | 1.0               |         | 1.0               |         |
| 14/24/34                                      | 3.8 (2.7-5.3)     | <0.0001 | 2.6 (1.5-4.4)     | 0.0004  |
| 15/25/35                                      | 0.7 (0.5-1.0)     | 0.031   | 0.7 (0.4-1.1)     | 0.132   |

Abbreviations: HR=Hazard Ratio, CI= Confidence Interval

Models control for all variables in the table.

<sup>a</sup>Grades shown in both eyes based on CARMS score<sup>14</sup>

1,1 (no AMD, no AMD)/1,2 (no AMD, early AMD)/2,2 (early AMD, early AMD)

1,3 (no AMD, intermediate AMD)/ 2,3 (early AMD, intermediate AMD)/ 3,3 (intermediate AMD, intermediate AMD)

1,4 (no AMD, geographic atrophy)/ 2,4 (early AMD, geographic atrophy)/3,4 (intermediate AMD, geographic atrophy)

1,5 (no AMD, neovascular disease)/ 2,5 (early AMD, neovascular disease)/3,5 (intermediate AMD, neovascular disease)

**eTable 2: Multivariate Association Between Demographic, Environmental, Macular, and Genetic Factors and Progression to Neovascular Disease**

| Progressors/Non-Progressors          | Derivation Sample<br>454/2460 |         | Validation Sample<br>150/829 |         |
|--------------------------------------|-------------------------------|---------|------------------------------|---------|
|                                      | HR (95% CI)                   | P-value | HR (95% CI)                  | P-value |
| <b>Age(y)</b>                        |                               |         |                              |         |
| <65                                  | 1.0                           |         | 1.0                          |         |
| 65-74                                | 1.4 (1.1-1.9)                 | 0.011   | 0.9 (1.0-3.6)                | 0.037   |
| 75+                                  | 2.0 (1.5-2.8)                 | <0.0001 | 2.6 (1.4-5.0)                | 0.003   |
| <b>Sex</b>                           |                               |         |                              |         |
| Female                               | 1.0                           |         | 1.0                          |         |
| Male                                 | 0.8 (0.6-1.0)                 | 0.019   | 0.7 (0.5-1.0)                | 0.082   |
| <b>Education</b>                     |                               |         |                              |         |
| ≤ High School                        | 1.0                           |         | 1.0                          |         |
| > High School                        | 0.9 (0.7-1.1)                 | 0.203   | 0.8 (0.6-1.1)                | 0.157   |
| <b>Smoking</b>                       |                               |         |                              |         |
| Never                                | 1.0                           |         | 1.0                          |         |
| Past                                 | 1.5 (1.2-1.8)                 | 0.0004  | 1.4 (1.0-2.0)                | 0.060   |
| Current                              | 1.9 (1.3-2.7)                 | 0.0002  | 2.4 (1.3-4.5)                | 0.005   |
| <b>BMI</b>                           |                               |         |                              |         |
| <25                                  | 1.0                           |         | 1.0                          |         |
| 25-29                                | 1.1 (0.9-1.4)                 | 0.257   | 1.3 (0.9-1.9)                | 0.219   |
| 30+                                  | 1.3 (1.0-1.6)                 | 0.052   | 0.9 (0.6-1.5)                | 0.700   |
| <b>ARMS2/HTRA1:rs10490924 (A69S)</b> |                               |         |                              |         |
| GG                                   | 1.0                           |         | 1.0                          |         |
| GT                                   | 1.5 (1.2-1.9)                 | <0.0001 | 1.5 (1.0-2.2)                | 0.044   |
| TT                                   | 2.2 (1.7-2.9)                 | <0.0001 | 3.2 (2.0-4.9)                | <0.0001 |
| <b>CFH:rs1061170 (Y402H)</b>         |                               |         |                              |         |
| TT                                   | 1.0                           |         | 1.0                          |         |
| CT                                   | 1.2 (0.9-1.7)                 | 0.228   | 1.5 (0.8-2.6)                | 0.197   |
| CC                                   | 1.3 (0.9-1.8)                 | 0.160   | 1.6 (0.8-3.0)                | 0.190   |
| <b>CFH:rs1410996</b>                 |                               |         |                              |         |
| TT                                   | 1.0                           |         | 1.0                          |         |
| CT                                   | 1.7 (1.0 - 3.0)               | 0.056   | 1.3 (0.4-4.1)                | 0.614   |
| CC                                   | 2.5 (1.4 - 4.4)               | 0.002   | 2.0 (0.6-6.3)                | 0.256   |
| <b>C2:rs9332739(E318D)</b>           |                               |         |                              |         |
| GG                                   | 1.0                           |         | 1.0                          |         |
| CG/CC                                | 0.7 (0.4-1.0)                 | 0.071   | 0.4 (0.2-1.0)                | 0.043   |

|                                               | Derivation Sample |         | Validation Sample |         |
|-----------------------------------------------|-------------------|---------|-------------------|---------|
|                                               | HR (95% CI)       | P-value | HR (95% CI)       | P-value |
| <b>CFB:rs641153(R32Q)</b>                     |                   |         |                   |         |
| CC                                            | 1.0               |         | 1.0               |         |
| CT/TT                                         | 0.5 (0.3-0.7)     | 0.001   | 0.8 (0.5-1.4)     | 0.452   |
| <b>C3:rs2230199(R102G)</b>                    |                   |         |                   |         |
| CC                                            | 1.0               |         | 1.0               |         |
| CG                                            | 1.3 (1.0-1.6)     | 0.010   | 1.5 (1.1-2.2)     | 0.015   |
| GG                                            | 1.6 (1.1-2.3)     | 0.006   | 2.1 (1.2-3.7)     | 0.009   |
| <b>Baseline Grade in each Eye<sup>a</sup></b> |                   |         |                   |         |
| 11/12/22                                      | 0.1 (0.08-0.2)    | <0.0001 | 0.2 (0.1-0.4)     | <0.0001 |
| 13/23/33                                      | 1.0               |         | 1.0               |         |
| 14/24/34                                      | 0.8 (0.4-1.5)     | 0.467   | 0.4 (0.2-1.1)     | 0.073   |
| 15/25/35                                      | 1.6 (1.3-1.9)     | <0.0001 | 1.3 (0.9-1.9)     | 0.173   |

Abbreviations: HR=Hazard Ratio, CI= Confidence Interval

Models control for all variables in the table.

<sup>a</sup>Grades shown in both eyes based on CARMS score<sup>14</sup>

1,1 (no AMD, no AMD)/1,2 (no AMD, early AMD)/2,2 (early AMD, early AMD)

1,3 (no AMD, intermediate AMD)/ 2,3 (early AMD, intermediate AMD)/ 3,3 (intermediate AMD, intermediate AMD)

1,4 (no AMD, geographic atrophy)/ 2,4 (early AMD, geographic atrophy)/3,4 (intermediate AMD, geographic atrophy)

1,5 (no AMD, neovascular disease)/ 2,5 (early AMD, neovascular disease)/3,5 (intermediate AMD, neovascular disease)
